# Supplementary material for: Bio-oil production from eight selected green landscaping wastes through hydrothermal liquefaction
Source: Royal Society of Chemistry journal article supplement (doi:10.1039/c5ra24760h), 2016-01-01
Supplement: c5ra24760h1.pdf [file c5ra24760h1.pdf]

## Appendix A. Supplementary data

Bio-oil production from eight selected green landscaping wastes through  
hydrothermal liquefaction

*Leichang Cao, Gang Luo, Shicheng Zhang\*, Jianmin Chen*

Shanghai Key Laboratory of Atmospheric Particle Pollution and Prevention (LAP<sup>3</sup>),  
Department of Environmental Science and Engineering, Fudan University, Shanghai  
200433, China

\*Corresponding author

Shicheng Zhang

Department of Environmental Science and Engineering

Fudan University, Shanghai 200433, China

e-mail: [zhangsc@fudan.edu.cn](mailto:zhangsc@fudan.edu.cn)

Telephone: +86-02165642297

Fax number: +86-02165642297

Number of Pages: 28

Number of Figures: 2

Number of Tables: 10

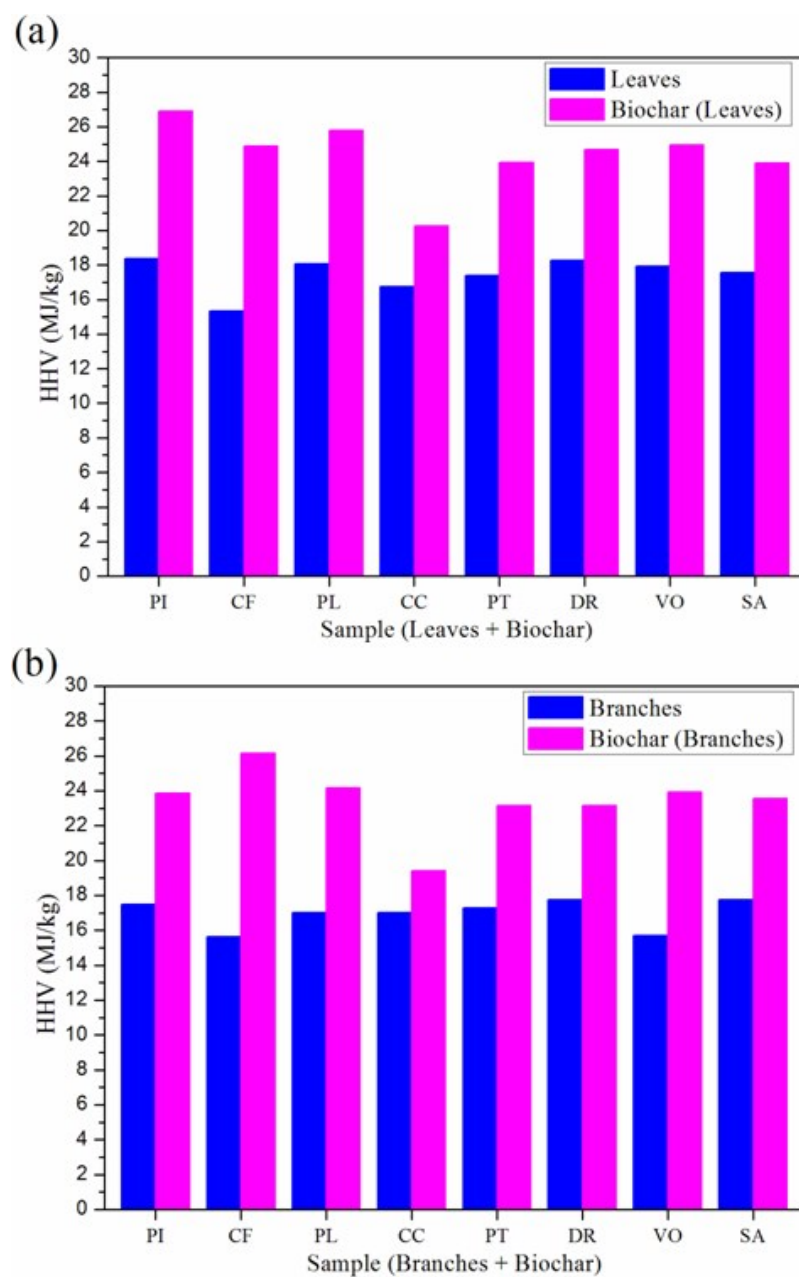

**Fig. S1** Comparing the HHVs of biochars and feedstocks. (a) leaves, (b) branches. Temperature, 300 °C; solid/liquid = 15g/150ml; reaction time, 30min; initial air pressure, 0.1 MPa; reaction pressure, 8.2-8.5 MPa.

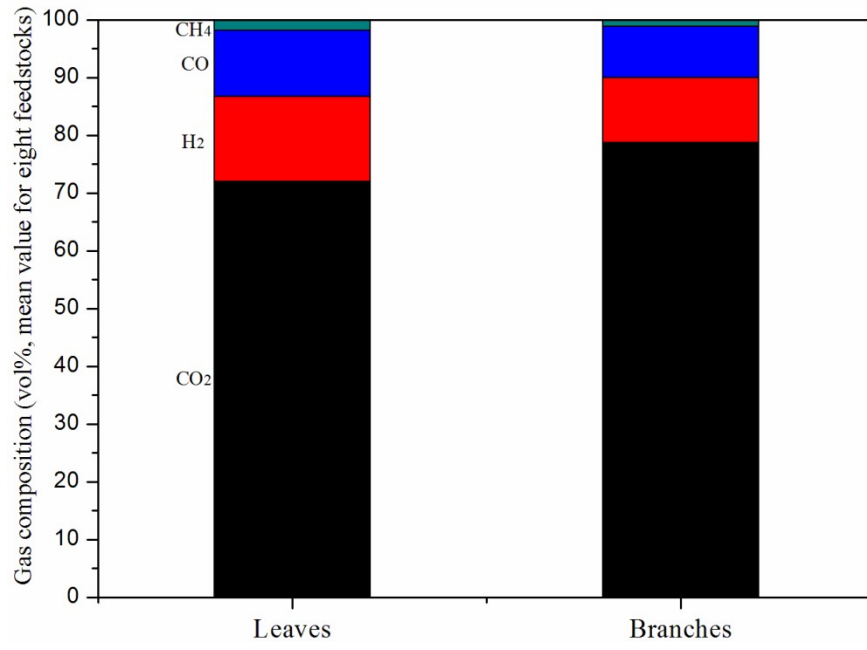

**Fig. S2** Composition of the gaseous products

**Table S1.** The information on the eight green landscaping plants

| Name of green landscaping plants | State of leaves |           | Morphology |        | Growth habit |            | Wood type |           | Botanical classification |            |
|----------------------------------|-----------------|-----------|------------|--------|--------------|------------|-----------|-----------|--------------------------|------------|
|                                  | Evergreen       | Deciduous | Trees      | Shrubs | Ombrophyte   | Heliophyte | Soft wood | Hard wood | Gymnosperm               | Angiosperm |
| <i>Pinus</i>                     | ☆               | ----      | ----       | ☆      | ----         | ☆          | ☆         | ----      | ☆                        | ----       |
| <i>Cupressus funebris</i>        | ☆               | ----      | ----       | ☆      | ----         | ☆          | ☆         | ----      | ☆                        | ----       |
| <i>Platanus</i>                  | ----            | ☆         | ----       | ☆      | ----         | ☆          | ----      | ☆         | ----                     | ☆          |
| <i>Cinnamomum camphora</i>       | ☆               | ----      | ----       | ☆      | ----         | ☆          | ----      | ☆         | ----                     | ☆          |
| <i>Pittosporum tobira</i>        | ☆               | ----      | ☆          | ----   | ☆            | ----       | ----      | ☆         | ----                     | ☆          |
| <i>Distylium racemosum</i>       | ☆               | ----      | ☆          | ----   | ☆            | ----       | ----      | ☆         | ----                     | ☆          |
| <i>Viburnum odoratissimum</i>    | ☆               | ----      | ☆          | ----   | ----         | ☆          | ----      | ☆         | ----                     | ☆          |
| <i>Salix babylonica</i>          | ----            | ☆         | ----       | ☆      | ----         | ☆          | ----      | ☆         | ----                     | ☆          |

檣

**Table S2.** Element composition and high heating value of biochar derived from leaves (wt.%)

| Biochar from leaves | <i>Pinus</i> | <i>Cupressus funebris</i> | <i>Platanus</i> | <i>Cinnamomum camphora</i> | <i>Pittosporum tobira</i> | <i>Distylium racemosum</i> | <i>Viburnum odoratissimum</i> | <i>Salix babylonica</i> | <b>Mean value</b> |
|---------------------|--------------|---------------------------|-----------------|----------------------------|---------------------------|----------------------------|-------------------------------|-------------------------|-------------------|
| Ultimate:           |              |                           |                 |                            |                           |                            |                               |                         |                   |
| C                   | 65.8         | 58.8                      | 62.0            | 56.1                       | 59.8                      | 60.9                       | 61.3                          | 59.9                    | <b>60.6</b>       |
| H                   | 6.6          | 7.6                       | 7.1             | 5.5                        | 6.7                       | 6.8                        | 6.8                           | 6.6                     | <b>6.7</b>        |
| O <sup>a</sup>      | 27.0         | 33.1                      | 30.1            | 36.7                       | 32.7                      | 31.4                       | 31.3                          | 32.3                    | <b>31.8</b>       |
| N                   | 0.6          | 0.5                       | 0.9             | 1.8                        | 0.8                       | 1.0                        | 0.6                           | 1.2                     | <b>0.9</b>        |
| S <sup>b</sup>      | <0.1         | <0.1                      | <0.1            | <0.1                       | <0.1                      | <0.1                       | <0.1                          | <0.1                    | <b>&lt;0.1</b>    |
| Atom ratios:        |              |                           |                 |                            |                           |                            |                               |                         |                   |
| H/C                 | 1.2          | 1.6                       | 1.4             | 1.2                        | 1.3                       | 1.3                        | 1.3                           | 1.3                     | <b>1.3</b>        |
| H/O                 | 3.9          | 3.7                       | 3.8             | 2.4                        | 3.3                       | 3.4                        | 3.5                           | 3.3                     | <b>3.4</b>        |
| HHV/(MJ/kg)         | 26.9         | 24.9                      | 25.8            | 20.3                       | 24.0                      | 24.7                       | 24.9                          | 23.9                    | <b>24.4</b>       |

<sup>a</sup> Calculated by difference; <sup>b</sup> determined by ICP-AES

**Table S3.** Element composition and high heating value of biochar derived from branches (wt.%)

| Biochar from branches | <i>Pinus</i> | <i>Cupressus funebris</i> | <i>Platanus</i> | <i>Cinnamomum camphora</i> | <i>Pittosporum tobira</i> | <i>Distylium racemosum</i> | <i>Viburnum odoratissimum</i> | <i>Salix babylonica</i> | <b>Mean value</b> |
|-----------------------|--------------|---------------------------|-----------------|----------------------------|---------------------------|----------------------------|-------------------------------|-------------------------|-------------------|
| Ultimate:             |              |                           |                 |                            |                           |                            |                               |                         |                   |
| C                     | 59.7         | 63.2                      | 60.3            | 51.2                       | 60.2                      | 60.9                       | 60.3                          | 57.8                    | <b>59.2</b>       |
| H                     | 6.7          | 6.9                       | 6.6             | 6.5                        | 6.1                       | 5.8                        | 6.5                           | 7.1                     | <b>6.5</b>        |
| O <sup>a</sup>        | 33.4         | 28.6                      | 31.7            | 40.8                       | 33.0                      | 32.6                       | 32.7                          | 34.5                    | <b>33.4</b>       |
| N                     | 0.2          | 1.3                       | 1.4             | 1.4                        | 0.7                       | 0.7                        | 0.5                           | 0.6                     | <b>0.8</b>        |
| S <sup>b</sup>        | <0.1         | <0.1                      | <0.1            | <0.1                       | <0.1                      | <0.1                       | <0.1                          | <0.1                    | <b>&lt;0.1</b>    |
| Atom ratios:          |              |                           |                 |                            |                           |                            |                               |                         |                   |
| H/C                   | 1.4          | 1.3                       | 1.3             | 1.5                        | 1.2                       | 1.2                        | 1.3                           | 1.5                     | <b>1.3</b>        |
| H/O                   | 3.2          | 3.9                       | 3.3             | 2.6                        | 2.9                       | 2.9                        | 3.2                           | 3.3                     | <b>3.2</b>        |
| HHV/(MJ/kg)           | 23.9         | 26.2                      | 24.2            | 19.4                       | 23.2                      | 23.1                       | 23.9                          | 23.6                    | <b>23.4</b>       |

<sup>a</sup> Calculated by difference; <sup>b</sup> determined by ICP-AES

**Table S4.** Composition of the gaseous products of each sample (vol.%)

| Biochar from branches | <i>Pinus</i> | <i>Cupressus funebris</i> | <i>Platanus</i> | <i>Cinnamomum camphora</i> | <i>Pittosporum tobira</i> | <i>Distylium racemosum</i> | <i>Viburnum odoratissimum</i> | <i>Salix babylonica</i> | <b>Mean value</b> |
|-----------------------|--------------|---------------------------|-----------------|----------------------------|---------------------------|----------------------------|-------------------------------|-------------------------|-------------------|
| Leaves:               |              |                           |                 |                            |                           |                            |                               |                         |                   |
| CO <sub>2</sub>       | 71.6         | 72.3                      | 71.9            | 74.8                       | 71.0                      | 72.1                       | 70.7                          | 71.2                    | <b>72.0</b>       |
| H <sub>2</sub>        | 14.6         | 14.6                      | 14.7            | 14.2                       | 14.9                      | 14.7                       | 15.0                          | 14.9                    | <b>14.7</b>       |
| CO                    | 12.4         | 11.2                      | 11.5            | 10.6                       | 11.7                      | 11.5                       | 11.7                          | 11.8                    | <b>11.5</b>       |
| CH <sub>4</sub>       | 1.4          | 1.9                       | 1.9             | 0.4                        | 2.4                       | 1.7                        | 2.6                           | 2.1                     | <b>1.8</b>        |
| Branches:             |              |                           |                 |                            |                           |                            |                               |                         |                   |
| CO <sub>2</sub>       | 76.9         | 78.9                      | 79.3            | 80.3                       | 80.8                      | 79.9                       | 77.2                          | 75.9                    | <b>78.7</b>       |
| H <sub>2</sub>        | 12.5         | 10.3                      | 11.2            | 11.1                       | 10.9                      | 11.0                       | 11.4                          | 12.3                    | <b>11.3</b>       |
| CO                    | 8.8          | 9.7                       | 8.8             | 7.7                        | 7.7                       | 7.8                        | 9.7                           | 10.7                    | <b>8.9</b>        |
| CH <sub>4</sub>       | 1.8          | 1.1                       | 0.7             | 0.9                        | 0.6                       | 1.3                        | 1.7                           | 1.1                     | <b>1.2</b>        |

**Table S5.** HHVs comparison of some reported bio-oils and the heavy oils from leaves in the present work

| Feedstock              | Reaction condition                       | HHV of bio-oil (MJ/kg) | References   |
|------------------------|------------------------------------------|------------------------|--------------|
| Leaves                 | 300 °C, 30 min, water, air               | 31.27 (mean value)     | Present work |
| <i>Pinus ponderosa</i> | 250 °C, 120 min, water, air              | 27.19                  | [13]         |
| Culture algal          | 300 °C, 60 min, water, N <sub>2</sub>    | 25.80                  | [42]         |
| Barley straw           | 300 °C, 0 min, water, N <sub>2</sub>     | 23.18                  | [44]         |
| Russian olive seeds    | 280 °C, 5 min, water, N <sub>2</sub>     | 22.89                  | [19]         |
| Boron-treated wood     | 350°C, 60 min, tetralin , H <sub>2</sub> | 19.98                  | [43]         |
| Corncob                | 280 °C, 12 min, water, N <sub>2</sub>    | 18.32                  | [45]         |



**Table S6.** Absorption bands of obtained bio-oils

| Position of the bands (cm <sup>-1</sup> ) | Functional group                         | Possible compounds present                                   |
|-------------------------------------------|------------------------------------------|--------------------------------------------------------------|
| 3383, 3377                                | -OH                                      | Alcohol, aldehydes, carboxylic acids                         |
| 2938, 2927; 2883, 2874                    | -CH, -CH <sub>2</sub> , -CH <sub>3</sub> | Aliphatic groups                                             |
| 1721, 1700                                | -C=O                                     | Carboxylic acid, ketone, aldehydes, and esters               |
| 1513                                      | C=C, C=N                                 | Unsaturated aliphatics, aromatics, amino acids, amides, etc. |
| 1236                                      | C-O-C, C-OH                              | Ethers, alcohols, sugars                                     |
| 1044, 1042                                | =C-H, -NH                                | Ethers, alcohols, polysaccharide-like substances             |
| 813, 752                                  | C-halogen, Aromatic rings                | Halogen compounds, aromatic compounds                        |
| 628                                       | C-CO-C                                   | Aliphatic ketones                                            |

**Table S7. Detailed chemicals of light oil from leaves**

| Light Oil-Leaves                                          |                 |                       |              |               |              |              |               |              |              |
|-----------------------------------------------------------|-----------------|-----------------------|--------------|---------------|--------------|--------------|---------------|--------------|--------------|
| Compound Name                                             | RT <sup>a</sup> | Plant Name / Area (%) |              |               |              |              |               |              |              |
|                                                           |                 | Cinnamomum            | Viburnum     | Distylium     | Pittosporum  | Pinus        | Cupressus     | Salix        | Platanus     |
| <b>Ester and Acid</b>                                     |                 | <b>2.385</b>          | <b>3.491</b> | <b>26.613</b> | <b>7.465</b> | <b>9.516</b> | <b>3.237</b>  | <b>0.569</b> | <b>3.751</b> |
| 2(3H)-Furanone, dihydro-                                  | 4.17            | -                     | -            | 0.330         | -            | 0.635        | -             | -            | -            |
| gamma-Valerolactone                                       | 4.57            | -                     | -            | -             | -            | -            | -             | -            | 0.496        |
| Crotonic acid, 2-methyl-                                  | 4.70            | -                     | -            | -             | 0.549        | -            | -             | -            | -            |
| Pentanoic acid, 4-methyl-                                 | 4.75            | 0.650                 | -            | -             | 1.066        | -            | -             | -            | -            |
| Pentanoic acid, 4-oxo-                                    | 6.03            | -                     | -            | -             | -            | 0.829        | -             | -            | -            |
| 1-Cyclopentene-1-carboxylic acid                          | 6.15            | -                     | -            | -             | 0.634        | -            | -             | -            | -            |
| Benzoic Acid                                              | 7.17            | -                     | -            | 1.216         | -            | 0.585        | -             | -            | 0.607        |
| Benzoic acid, 4-hydroxy-3-methoxy-                        | 9.67            | 0.656                 | -            | -             | -            | -            | -             | -            | -            |
| Benzoic acid, 3-ethoxy-                                   | 10.05           | -                     | 0.698        | -             | -            | -            | -             | -            | -            |
| Benzoic acid, 3-hydroxy-                                  | 10.06           | -                     | -            | 8.519         | 4.783        | 6.943        | -             | -            | -            |
| 2-(5-tert-Butyl-4-hydroxy-2-methylphenyl)benzoic acid     | 10.53           | -                     | -            | 0.162         | -            | -            | -             | -            | -            |
| Benzeneacetic acid, .alpha.-hydroxy-2-methoxy-            | 11.38           | 0.669                 | -            | -             | -            | -            | -             | -            | -            |
| Benzeneacetic acid, 4-hydroxy-3-methoxy-                  | 11.38           | -                     | 0.857        | -             | -            | -            | 3.237         | -            | -            |
| Dibutyl phthalate                                         | 13.75           | -                     | 1.668        | 16.147        | 0.435        | 0.525        | -             | -            | -            |
| n-Hexadecanoic acid                                       | 14.51           | 0.410                 | -            | 0.238         | -            | -            | -             | 0.569        | 2.305        |
| Octadecanoic acid                                         | 15.31           | -                     | -            | -             | -            | -            | -             | -            | 0.343        |
| Hexadecanoic acid, 2-hydroxy-1-(hydroxymethyl)ethyl ester | 17.77           | -                     | 0.269        | -             | -            | -            | -             | -            | -            |
| <b>Ketone and Alcohol</b>                                 |                 | <b>7.173</b>          | <b>1.754</b> | <b>3.469</b>  | <b>3.211</b> | <b>5.524</b> | <b>10.552</b> | <b>9.374</b> | <b>9.245</b> |
| 2,5-Hexanedione                                           | 4.34            | -                     | -            | 0.429         | -            | 0.517        | -             | -            | -            |

S11

|                                                        |       |               |               |              |               |              |               |              |              |
|--------------------------------------------------------|-------|---------------|---------------|--------------|---------------|--------------|---------------|--------------|--------------|
| 2(3H)-Furanone, dihydro-5-methyl-                      | 4.67  | -             | -             | -            | -             | 0.301        | 0.523         | -            | -            |
| Benzenemethanol                                        | 5.62  | 0.594         | 0.336         | 0.252        | 0.898         | -            | 0.461         | 1.761        | 0.406        |
| cis-1,2-Cyclohexanediol                                | 5.91  | -             | -             | -            | -             | -            | -             | 1.467        | -            |
| Benzeneethanol                                         | 6.50  | 2.385         | 0.920         | -            | 1.723         | -            | 0.833         | 0.782        | 0.635        |
| Benzeneethanol, 2-methoxy-                             | 8.17  | -             | -             | 0.990        | -             | 4.706        | -             | 1.729        | -            |
| Acetophenone, 4-methoxy-                               | 8.97  | -             | -             | -            | -             | -            | 0.562         | -            | -            |
| Ethanone, 1-(2-hydroxyphenyl)-                         | 9.31  | -             | -             | -            | -             | -            | -             | 1.659        | -            |
| Ethanone, 1-(3-hydroxyphenyl)-                         | 9.22  | -             | -             | -            | -             | -            | -             | -            | 0.724        |
| Ethanone, 1-(4-hydroxyphenyl)-                         | 9.45  | -             | -             | -            | -             | -            | 3.158         | -            | -            |
| Benzeneethanol, 4-hydroxy-                             | 9.51  | 3.429         | -             | 1.270        | -             | -            | -             | -            | -            |
| Ethanone, 1-(4-hydroxy-3-methoxyphenyl)-               | 9.58  | -             | -             | -            | -             | -            | -             | 1.977        | 1.205        |
| 9,10-dimethoxy-2,3-dihydroanthracene-1,4-dione         | 9.77  | -             | -             | -            | 0.590         | -            | -             | -            | 0.522        |
| Cyclonon-4-ynone                                       | 9.80  | -             | -             | -            | -             | -            | -             | -            | 0.603        |
| Vanillyl methyl ketone                                 | 9.85  | -             | -             | -            | -             | -            | 2.744         | -            | 3.014        |
| Rhododendrol                                           | 9.97  | -             | -             | -            | -             | -            | 1.330         | -            | -            |
| 2H-1-Benzopyran-2-one, 8-methoxy-                      | 11.51 | -             | -             | -            | -             | -            | 0.940         | -            | -            |
| tricyclo[4.3.2.0(1,4)]undeca-2,4(5),8,10-tetraen-7-one | 12.19 | -             | 0.499         | -            | -             | -            | -             | -            | -            |
| 8,8-Dimethyl-1,9-diazabicyclo[5.3.0]decane-5,10-dione  | 12.27 | 0.766         | -             | -            | -             | -            | -             | -            | -            |
| 3,9-DIAZATRICYCLO[7.3.0.0(3,7)]DODECAN-2,8-DIONE       | 14.41 | -             | -             | 0.528        | -             | -            | -             | -            | -            |
| Ethanone, 1-(4-hydroxy-3,5-dimethoxyphenyl)-           | 15.01 | -             | -             | -            | -             | -            | -             | -            | 2.136        |
| <b>Cyclopentenone</b>                                  |       | <b>14.250</b> | <b>11.107</b> | <b>6.810</b> | <b>15.604</b> | <b>7.761</b> | <b>11.447</b> | <b>5.662</b> | <b>8.535</b> |
| Cyclohexanone                                          | 3.92  | -             | 0.549         | 0.217        | -             | -            | -             | -            | -            |
| 2-Cyclopenten-1-one.                                   | 3.93  | 0.201         | 3.678         | 0.199        | -             | -            | -             | -            | -            |
| 2-Cyclopenten-1-one.2-methyl-                          | 4.07  | 4.387         | -             | 2.191        | 5.532         | 2.739        | -             | -            | -            |
| Bicyclo[3.1.0]hexan-3-one                              | 4.39  | -             | S12           | -            | -             | -            | -             | -            | -            |
| 2,5-Dimethyl-2-cyclopentenone                          | 4.55  | 0.267         | -             | -            | -             | -            | -             | 0.128        | -            |
| 3-Ethylcyclopentanone                                  | 4.69  | 0.237         | -             | -            | -             | -            | -             | -            | -            |

|                                                                 |       |               |               |               |               |               |               |               |               |
|-----------------------------------------------------------------|-------|---------------|---------------|---------------|---------------|---------------|---------------|---------------|---------------|
| 2-Cyclopenten-1-one.3-methyl-                                   | 4.78  | 2.664         | 1.877         | 1.059         | 3.578         | 1.564         | 2.877         | 1.348         | 2.226         |
| 2-Cyclopenten-1-one, 3,4-dimethyl-                              | 5.13  | 1.370         | 0.503         | -             | -             | -             | 0.588         | 0.469         | 0.494         |
| 2,3-Dimethyl-2-cyclopenten-1-one                                | 5.19  | 1.668         | -             | 1.811         | -             | -             | -             | -             | -             |
| 2,5-Cyclohexadiene-1,4-dione, 2-methyl-                         | 5.37  | 1.134         | 0.287         | -             | -             | -             | -             | -             | -             |
| Bicyclo[4.1.0]hept-3-ene-2,5-dione                              | 5.40  | -             | -             | -             | -             | 0.397         | -             | -             | -             |
| 2-Cyclopenten-1-one, 2-hydroxy-3-methyl-                        | 5.54  | 0.461         | 0.603         | 0.657         | 1.369         | 1.230         | 1.865         | -             | 2.632         |
| 2-Cyclopenten-1-one.2,3-dimethyl-                               | 5.67  | 1.862         | 3.321         | -             | 4.513         | 0.880         | 3.009         | 2.641         | 1.703         |
| 3,5-DIMETHYL CYCLOPENTENOLONE                                   | 5.89  | -             | -             | -             | 0.618         | -             | 1.102         | -             | 0.676         |
| 1,4-Cyclohexanedione                                            | 6.13  | -             | -             | -             | -             | -             | 0.152         | -             | -             |
| 2-Cyclopenten-1-one, 3-ethyl-2-hydroxy-                         | 6.56  | -             | -             | 0.677         | -             | -             | -             | -             | -             |
| 2-Hydroxy-5,5-dimethylcyclopent-2-en-1-one                      | 6.61  | -             | -             | -             | -             | -             | 1.854         | -             | -             |
| 2-(2-Oxopropyl)-1-cyclopentanone                                | 7.25  | -             | -             | -             | -             | -             | -             | -             | 0.804         |
| 2H-Benzocyclohepten-2-one, 3,4,4a,5,6,7,8,9-octahydro-          | 9.43  | -             | -             | -             | -             | -             | -             | 1.076         | -             |
| Pyrrolo[1,2-a]pyrazine-1,4-dione, hexahydro-3-(2-methylpropyl)- | 14.43 | -             | -             | -             | -             | 0.953         | -             | -             | -             |
| <b>Phenolics</b>                                                |       | <b>53.654</b> | <b>69.647</b> | <b>57.616</b> | <b>46.715</b> | <b>68.771</b> | <b>53.054</b> | <b>49.108</b> | <b>62.554</b> |
| Phenol                                                          | 5.03  | 10.713        | 27.695        | 24.861        | 17.623        | 41.447        | 18.544        | 11.144        | 13.062        |
| Phenol.2-methyl-                                                | 5.86  | 1.122         | 1.022         | 0.563         | 0.871         | 0.751         | -             | 0.951         | 0.399         |
| Phenol.3-methyl-                                                | 6.08  | -             | 2.823         | 1.507         | -             | -             | -             | -             | -             |
| Phenol.4-methyl-                                                | 6.08  | 2.492         | -             | -             | -             | 1.710         | -             | 1.303         | 1.438         |
| Phenol.2-methoxy-                                               | 6.24  | 8.077         | 3.743         | 2.901         | 4.471         | 7.085         | 11.480        | 11.443        | 10.364        |
| Phenol, 2-ethyl-                                                | 7.05  | -             | -             | 0.920         | -             | -             | -             | -             | -             |
| Phenol.4-ethyl-                                                 | 7.05  | 2.975         | 1.603         | -             | 0.845         | 1.207         | 0.775         | 1.103         | -             |
| Phenol.4-methoxy-2-methyl-                                      | 7.23  | -             | -             | -             | -             | -             | -             | 1.731         | -             |
| Phenol.2-methoxy-4-methyl-                                      | 7.32  | 1.174         | S13           | 0.478         | 1.035         | 1.121         | -             | -             | 1.159         |
| 1,2-Benzenediol                                                 | 7.40  | 10.329        | -             | 9.017         | 4.966         | 9.228         | 11.681        | 11.510        | 6.788         |
| 1,2-Benzenediol.3-methoxy-                                      | 8.02  | 5.060         | -             | -             | -             | -             | -             | 1.549         | 4.125         |
| Hydroquinone                                                    | 8.14  | -             | 6.865         | 2.405         | 3.698         | -             | 1.829         | 2.676         | -             |
| Phenol, 4-ethyl-2-methoxy-                                      | 8.23  | -             | -             | -             | -             | -             | 3.276         | -             | 4.630         |

|                                                            |       |              |              |              |              |              |              |               |              |
|------------------------------------------------------------|-------|--------------|--------------|--------------|--------------|--------------|--------------|---------------|--------------|
| 1,2-Benzenediol, 4-methyl-                                 | 8.30  | 1.855        | 2.122        | 0.676        | -            | -            | 1.773        | -             | 0.911        |
| 1,4-Benzenediol.2-methyl-                                  | 8.78  | 0.801        | 2.099        | 1.463        | 3.216        | 0.779        | 2.978        | -             | -            |
| Phenol.2,6-dimethoxy-                                      | 8.84  | 5.937        | 3.550        | 3.396        | 4.717        | 2.473        | -            | 5.697         | 18.945       |
| 1,2,3-Benzenetriol                                         | 9.10  | -            | -            | 6.225        | -            | 1.136        | -            | -             | -            |
| 4-Ethylcatechol                                            | 9.13  | 1.198        | -            | -            | -            | -            | -            | -             | -            |
| 3,7-Di-tert-butyl-1-naphthol                               | 9.39  | -            | -            | -            | -            | 0.736        | -            | -             | -            |
| 1,3-Benzenediol, 4-ethyl-                                  | 9.48  | -            | -            | 0.598        | 2.297        | -            | -            | -             | -            |
| 3,4,5-Trihydroxytoluene                                    | 9.61  | -            | -            | 1.345        | -            | -            | -            | -             | -            |
| 1,4-Benzenediol, 2,6-dimethyl-                             | 9.73  | -            | -            | -            | 1.313        | -            | -            | -             | -            |
| Phenol, 2,6-dimethoxy-4-(2-propenyl)-                      | 14.46 | -            | -            | -            | -            | -            | -            | -             | 0.569        |
| Phenol, 2,2'-methylenebis[6-(1,1-dimethylethyl)-4-methyl-  | 17.30 | 1.921        | 2.854        | 1.261        | 1.665        | 1.097        | 0.721        | -             | -            |
| Phenol, 4,4'-methylenebis[2,6-dimethoxy-                   | 18.32 | -            | -            | -            | -            | -            | -            | -             | 0.165        |
| <b>Furan&amp;Aldehydes</b>                                 |       | <b>0.861</b> | <b>0.000</b> | <b>0.426</b> | <b>0.000</b> | <b>0.000</b> | <b>0.000</b> | <b>0.000</b>  | <b>0.000</b> |
| Ethanone, 1-(2-furanyl)-                                   | 4.13  | -            | -            | 0.426        | -            | -            | -            | -             | -            |
| 2,4-Dimethyl-3-(methoxycarbonyl)-5-ethylfuran              | 10.34 | 0.861        | -            | -            | -            | -            | -            | -             | -            |
| <b>Alkane &amp; Alkene &amp; Alkyne</b>                    |       | <b>1.854</b> | <b>2.810</b> | <b>0.155</b> | <b>6.796</b> | <b>0.487</b> | <b>8.688</b> | <b>13.317</b> | <b>6.198</b> |
| 1,4-Hexadiene                                              | 4.47  | -            | -            | -            | 0.352        | -            | -            | -             | 0.145        |
| trans-1,4-Hexadiene                                        | 5.05  | -            | -            | -            | -            | -            | 0.269        | -             | -            |
| 2,4-Hexadiene, 3,4-dimethyl-, (Z,Z)-                       | 5.15  | -            | -            | -            | 1.284        | -            | -            | -             | -            |
| 1-Methylbicyclo[4.1.0]heptane (1-Methylnorcarane)          | 5.49  | -            | -            | -            | 1.161        | -            | -            | -             | -            |
| 4-acetyl-1-methyl-1-cyclohexene                            | 6.69  | 1.457        | -            | -            | -            | -            | -            | -             | -            |
| Benzocycloheptatriene                                      | 8.51  | 0.397        | S14          | -            | -            | -            | -            | -             | -            |
| (Trimethyl-[3-(3-phenylcyclopentylidene)-1-propynyl]silane | 8.74  | -            | -            | -            | 2.003        | 0.217        | -            | -             | -            |
| 1-[2-(Trimethylsilyl)ethynyl]-3-phenylcyclohexene          | 8.80  | -            | -            | -            | -            | -            | 2.639        | -             | -            |
| 1-Tetradecene                                              | 9.03  | -            | -            | -            | -            | -            | -            | 0.982         | -            |
| 2-(2-Naphthyl)-1-propene                                   | 9.67  | -            | 0.394        | -            | -            | 0.270        | -            | -             | -            |

|                                                       |       |               |               |              |               |              |               |               |              |
|-------------------------------------------------------|-------|---------------|---------------|--------------|---------------|--------------|---------------|---------------|--------------|
| 3,5,7-Trioxatetracyclo[7.2.1.0(4,11).0(6,10)]dodecane | 9.68  | -             | -             | -            | 0.866         | -            | -             | -             | -            |
| 7,8-dimethylbenzocyclooctene                          | 9.71  | -             | -             | -            | -             | -            | -             | 1.081         | -            |
| 1-Hexadecene                                          | 10.06 | -             | -             | -            | -             | -            | 1.352         | 1.770         | 1.480        |
| 1,4-diaza-2,5-dioxo-3-isobutyl bicyclo[4.3.0]nonane   | 14.31 | -             | 2.185         | -            | -             | -            | -             | -             | -            |
| 1-Octadecene                                          | 16.13 | -             | 0.233         | -            | -             | -            | 3.149         | 3.697         | 2.079        |
| 1-Nonadecene                                          | 17.33 | -             | -             | -            | -             | -            | 1.280         | 1.505         | 1.568        |
| 3-Eicosene, (E)-                                      | 17.63 | -             | -             | -            | -             | -            | -             | 1.319         | -            |
| 3-benzyl-1,4-diaza-2,5-dioxobicyclo[4.3.0]nonane      | 16.87 | -             | -             | 0.155        | 1.132         | -            | -             | 2.641         | -            |
| Cyclotetracosane                                      | 17.12 | -             | -             | -            | -             | -            | -             | 0.325         | 0.685        |
| 1-Heptadecene                                         | 18.47 | -             | -             | -            | -             | -            | -             | -             | 0.243        |
| <b>Others</b>                                         |       | <b>19.822</b> | <b>11.190</b> | <b>4.909</b> | <b>20.204</b> | <b>7.940</b> | <b>13.020</b> | <b>21.969</b> | <b>9.716</b> |

S11

S15

**Table S8. Detailed chemicals of heavy oil from leaves**

|                                                         |                 | Heavy Oil-Leaves      |               |               |               |               |              |              |               |
|---------------------------------------------------------|-----------------|-----------------------|---------------|---------------|---------------|---------------|--------------|--------------|---------------|
| Compound Name                                           | RT <sup>a</sup> | Plant Name / Area (%) |               |               |               |               |              |              |               |
|                                                         |                 | Cinnamomum            | Viburnum      | Distylium     | Pittosporum   | Pinus         | Cupressus    | Salix        | Platanus      |
| <b>Ester and Acid</b>                                   |                 | <b>18.102</b>         | <b>38.031</b> | <b>27.156</b> | <b>62.025</b> | <b>21.028</b> | <b>4.610</b> | <b>1.487</b> | <b>4.442</b>  |
| Dodecanoic acid                                         | 10.58           | -                     | -             | -             | -             | 3.771         | -            | -            | -             |
| Tridecanoic acid                                        | 12.22           | -                     | -             | -             | -             | -             | -            | -            | 4.442         |
| Tetradecanoic acid                                      | 12.48           | -                     | 2.209         | -             | -             | 0.000         | -            | -            | -             |
| Linoleic acid ethyl ester                               | 12.71           | -                     | -             | -             | -             | -             | 1.927        | -            | -             |
| 12-Hydroxydodecanoic acid                               | 13.42           | -                     | -             | -             | -             | 4.473         | -            | -            | -             |
| Dibutyl phthalate                                       | 13.75           | -                     | 2.877         | -             | -             | -             | 2.683        | -            | -             |
| 1,2-Benzenedicarboxylic acid, bis(2-methylpropyl) ester | 13.75           | 2.884                 | -             | 2.306         | 4.183         | 4.483         | -            | 1.487        | -             |
| l-Proline, N-butoxycarbonyl-, isohexyl ester            | 14.29           | -                     | -             | -             | -             | -             | -            | -            | -             |
| n-Hexadecanoic acid                                     | 14.51           | 10.126                | 18.679        | 10.465        | 14.803        | 6.154         | -            | -            | -             |
| 9,12-Octadecadienoic acid (Z,Z)-                        | 15.70           | 5.093                 | 14.266        | 3.452         | 43.038        | 2.149         | -            | -            | -             |
| 9-Octadecenoic acid, (E)-                               | 15.74           | -                     | -             | 8.138         | -             | -             | -            | -            | -             |
| Octadecanoic acid                                       | 15.87           | -                     | -             | 1.401         | -             | -             | -            | -            | -             |
| Benzeneacetic acid, 4-hydroxy-3-methoxy-, methyl ester  | 16.85           | -                     | -             | 1.394         | -             | -             | -            | -            | -             |
| <b>Ketone and Alcohol</b>                               |                 | <b>12.260</b>         | <b>1.257</b>  | <b>4.259</b>  | <b>1.533</b>  | <b>4.910</b>  | <b>7.283</b> | <b>4.171</b> | <b>13.360</b> |
| Benzeneethanol, 2-methoxy-                              | 8.17            | 4.662                 | 1.257         | 1.403         | 1.533         | 4.910         | 2.436        | 4.171        | 5.282         |
| (3S)-2-chloro-1-phenyl-1-penten-3-ol                    | 11.01           | -                     | -             | 1.190         | -             | -             | -            | -            | 3.485         |
| 1-Butanone, 1-(2,4,6-trihydroxy-3-methylphenyl)-        | 12.01           | -                     | -             | -             | -             | -             | -            | -            | 1.492         |

|                                                                                                                            |       |               |               |               |               |               |               |               |               |
|----------------------------------------------------------------------------------------------------------------------------|-------|---------------|---------------|---------------|---------------|---------------|---------------|---------------|---------------|
| 5,6-Dimethyl-4-phenyl-3-cyanopyridine-2(1H)-thione<br>(2R(*),3aR(*),6aR(*))-Hexahydro-2-phenyl-4H-cyclopenta[b]furan-4-one | 12.31 | -             | -             | -             | -             | -             | 1.840         | -             | -             |
| (Z)6,(Z)9-Pentadecadien-1-ol                                                                                               | 13.71 | -             | -             | 1.667         | -             | -             | -             | -             | -             |
| 1-Phenanthrenemethanol                                                                                                     | 15.74 | 7.597         | -             | -             | -             | -             | -             | -             | -             |
| 17.17                                                                                                                      | -     | -             | -             | -             | -             | -             | 3.007         | -             | -             |
| Androst-16-en-3-one, (5.alpha.)-                                                                                           | 21.01 | -             | -             | -             | -             | -             | -             | -             | 3.102         |
| <b>Cyclopentenone</b>                                                                                                      |       | <b>11.904</b> | <b>4.155</b>  | <b>8.367</b>  | <b>1.410</b>  | <b>4.535</b>  | <b>2.897</b>  | <b>2.785</b>  | <b>0.000</b>  |
| 2-Cyclopenten-1-one.                                                                                                       | 3.93  | -             | 1.330         | -             | -             | -             | -             | -             | -             |
| 2-Cyclopenten-1-one, 2-methyl-                                                                                             | 4.07  | 1.124         | -             | 1.642         | 1.410         | 1.671         | -             | -             | -             |
| 2-Cyclopenten-1-one,2,3-dimethyl-                                                                                          | 5.67  | -             | 2.825         | 2.383         | -             | -             | -             | -             | -             |
| 4-Cycloocten-1-one, 6,6-dimethyl-, (E)-                                                                                    | 11.63 | -             | -             | -             | -             | -             | -             | 1.516         | -             |
| Oxacyclohexadecan-2-one                                                                                                    | 12.74 | -             | -             | -             | -             | 2.864         | -             | -             | -             |
| 1,2,4-TRIAZOLO(3,4-C)(1,2,4)-BENZOTRIAZIN-1(5H)-ONE                                                                        | 14.81 | -             | -             | -             | -             | -             | 2.897         | -             | -             |
| Oxacycloheptadec-8-en-2-one                                                                                                | 16.23 | 10.780        | -             | 4.343         | -             | -             | -             | -             | -             |
| 4-(3',4'-Dimethoxyphenyl)-2-hydroxy-7-methoxycyclohepta-2,4,6-trien-1-one                                                  | 18.23 | -             | -             | -             | -             | -             | -             | 1.270         | -             |
| <b>Phenolics</b>                                                                                                           |       | <b>43.209</b> | <b>45.535</b> | <b>49.168</b> | <b>27.067</b> | <b>60.739</b> | <b>24.894</b> | <b>27.032</b> | <b>40.399</b> |
| Phenol                                                                                                                     | 5.03  | 8.411         | 17.350        | 24.833        | 12.396        | 37.625        | 4.303         | 7.377         | 7.050         |
| Phenol,2-methyl-                                                                                                           | 5.86  | -             | -             | -             | -             | -             | -             | 1.357         | -             |
| Phenol,4-methyl-                                                                                                           | 6.08  | 2.077         | -             | 1.541         | 2.338         | -             | -             | -             | -             |
| Phenol,2-methoxy-                                                                                                          | 6.24  | 5.291         | 3.117         | 3.386         | 3.136         | 7.067         | 3.240         | 7.319         | 5.955         |
| Phenol,4-ethyl-                                                                                                            | 7.05  | 7.291         | 3.698         | 2.979         | 1.929         | 2.372         | -             | 2.232         | -             |
| Phenol,2-methoxy-4-methyl-                                                                                                 | 7.32  | -             | -             | -             | -             | 1.838         | -             | 0.928         | 1.115         |
| Phenol,2,6-dimethoxy-                                                                                                      | 8.84  | 2.816         | 0.926         | S17           | -             | -             | -             | 2.784         | 13.132        |
| Phenol, 2-methoxy-4-propyl-                                                                                                | 8.99  | -             | -             | -             | -             | 1.386         | -             | 2.872         | 2.079         |



|                                                           |       |              |              |              |              |              |               |               |               |
|-----------------------------------------------------------|-------|--------------|--------------|--------------|--------------|--------------|---------------|---------------|---------------|
| Phenol, 2-methoxy-4-(2-propenyl)-                         | 9.69  | -            | -            | -            | -            | -            | -             | 2.164         | 2.152         |
| Totarol                                                   | 13.81 | -            | -            | -            | -            | -            | 12.570        | -             | -             |
| Phenol, 2,2'-methylenebis[6-(1,1-dimethylethyl)-4-methyl- | 17.30 | 17.324       | 20.444       | 13.809       | 7.267        | 10.453       | 4.781         | -             | -             |
| 2-Phenanthrenol,                                          |       |              |              |              |              |              |               |               |               |
| 4b,5,6,7,8,8a,9,10-octahydro-                             | 19.97 |              |              |              |              |              |               |               |               |
| 4b,8,8-trimethyl-1-(1-methylethyl)-                       |       |              |              |              |              |              |               |               | 4.997         |
| , (4bS-trans)-                                            |       |              |              |              |              |              |               |               |               |
| Gigantol                                                  | 20.03 | -            | -            | -            | -            | -            | -             | -             | 3.918         |
| <b>Furan&amp;Aldehydes</b>                                |       | <b>1.216</b> | <b>0.000</b> | <b>1.453</b> | <b>0.000</b> | <b>0.000</b> | <b>4.283</b>  | <b>8.800</b>  | <b>8.719</b>  |
| 2-tert-Butyl-4-(hydroxymethyl)-5-formylfuran              | 10.33 | -            | -            | 1.453        | -            | -            | -             | -             | -             |
| 2,4-Dimethyl-3-(methoxycarbonyl)-5-ethylfuran             | 10.34 | 1.216        | -            | -            | -            | -            | -             | -             | -             |
| E-15-Heptadecenal                                         | 10.96 | -            | -            | -            | -            | -            | 4.283         | 8.800         | 6.196         |
| 3,6-Dimethoxy-2-ethylbenzaldehyde                         | 11.41 | -            | -            | -            | -            | -            | -             | -             | 1.013         |
| Benzaldehyde, 3-hydroxy-, (2,4-dinitrophenyl)hydrazone    | 22.03 | -            | -            | -            | -            | -            | -             | -             | 1.510         |
| <b>Indole</b>                                             | -     | <b>0.000</b> | <b>0.000</b> | <b>0.000</b> | <b>0.000</b> | <b>0.000</b> | <b>0.000</b>  | <b>5.940</b>  | <b>0.000</b>  |
| Indole                                                    | 8.23  | -            | -            | -            | -            | -            | -             | 1.820         | -             |
| 1H-Indole, 2-methyl-                                      | 9.09  | -            | -            | -            | -            | -            | -             | 2.081         | -             |
| 1H-Indole, 2,3-dimethyl-                                  | 9.79  | -            | -            | -            | -            | -            | -             | 1.294         | -             |
| 1H-Indole, 2,3,7-trimethyl-                               | 10.39 | -            | -            | -            | -            | -            | -             | 0.747         | -             |
| <b>Alkane &amp; Alkene &amp; Alkyne</b>                   |       | <b>9.426</b> | <b>5.075</b> | <b>7.095</b> | <b>6.210</b> | <b>7.106</b> | <b>56.032</b> | <b>42.076</b> | <b>33.082</b> |
| 4-Acetyl-1-methylcyclohexene                              | 6.69  | 2.967        | -            |              | -            | -            | -             | -             | -             |
| 1-Tetradecene                                             | 9.03  | -            | -            | S18          | -            | -            | 0.936         | 2.995         | 2.274         |
| 2-(2-Naphthyl)-1-propene                                  | 9.53  | -            | -            | -            | -            | -            | -             | -             | 1.375         |
| 1-Hexadecene                                              | 10.06 | -            | -            | -            | -            | -            | 2.318         | 5.170         | 4.506         |
| 3-(2-naphthyl)-1-butene                                   | 10.11 | -            | -            | -            | -            | -            | -             | -             | 3.807         |

|                                                                               |       |              |              |              |              |              |              |              |              |
|-------------------------------------------------------------------------------|-------|--------------|--------------|--------------|--------------|--------------|--------------|--------------|--------------|
| 4,6,6-Trimethyl-2-(3-methylbuta-1,3-dienyl)-3-oxatricyclo[5.1.0.0(2,4)]octane | 10.57 | 2.212        | -            | -            | -            | -            | -            | -            | -            |
| 4-n-Hexylthiane, S,S-dioxide                                                  | 11.26 | -            | -            | -            | -            | -            | 1.140        | -            | -            |
| 1H-Benzo[b]fluorene                                                           | 11.42 | -            | -            | 2.222        | -            | -            | -            | -            | -            |
| 2-Hexadecene, 3,7,11,15-tetramethyl-, [R-[R@,R@-(E)]]-                        | 11.33 | -            | -            | -            | -            | -            | -            | 4.108        | -            |
| Oxirane, tridecyl-                                                            | 11.86 | -            | -            | -            | -            | -            | 20.979       | -            | -            |
| Cyclohexadecane, 1,2-diethyl-                                                 | 12.01 | -            | -            | -            | -            | -            | 6.211        | -            | -            |
| 11-Dodecenol                                                                  | 12.46 | -            | -            | -            | -            | 7.106        | -            | -            | -            |
| 1-Eicosene                                                                    | 13.21 | -            | -            | -            | -            | -            | 9.607        | -            | -            |
| 1-Phenyl-1-(1'-naphthyl)-1,2-hexadiene                                        | 13.71 | -            | -            | -            | -            | -            | 6.047        | -            | -            |
| Cyclohexane, hexaethylidene-                                                  | 15.07 | -            | -            | 1.521        | -            | -            | -            | -            | -            |
| 1,4,9-Decatriene, (Z)-                                                        | 15.81 | 2.786        | -            | -            | -            | -            | -            | -            | -            |
| Cyclooctene, 3-ethenyl-                                                       | 15.81 | -            | -            | 2.328        | 6.210        | -            | -            | -            | -            |
| 4-Hexadecen-6-yne, (E)-                                                       | 15.82 | -            | 3.243        | -            | -            | -            | -            | -            | -            |
| Cyclopentadecane                                                              | 16.13 | -            | -            | 1.025        | -            | -            | -            | -            | -            |
| 1-Octadecene                                                                  | 16.13 | 1.461        | 1.832        | -            | -            | -            | -            | -            | -            |
| Cyclotetracosane                                                              | 17.12 | -            | -            | -            | -            | -            | 4.884        | 10.327       | 5.164        |
| 3-Eicosene, (E)-                                                              | 17.63 | -            | -            | -            | -            | -            | -            | 7.860        | -            |
| 1-Docosene                                                                    | 17.92 | -            | -            | -            | -            | -            | 3.911        | 2.158        | -            |
| 1-Nonadecene                                                                  | 17.33 | -            | -            | -            | -            | -            | -            | -            | 6.418        |
| 1-Heptadecene                                                                 | 18.47 | -            | -            | S19          | -            | -            | -            | 9.461        | 9.537        |
| <b>Others</b>                                                                 |       | <b>3.881</b> | <b>5.946</b> | <b>2.501</b> | <b>1.756</b> | <b>1.681</b> | <b>0.000</b> | <b>7.706</b> | <b>0.000</b> |

**Table S9. Detailed chemicals of light oil from branches**

**Light Oil-Branches**

| Compound Name                    | RT <sup>a</sup> | Plant Name / Area (%) |              |              |              |              |              |               |              |
|----------------------------------|-----------------|-----------------------|--------------|--------------|--------------|--------------|--------------|---------------|--------------|
|                                  |                 | Cinnamomum            | Viburnum     | Distylium    | Pittosporum  | Pinus        | Cupressus    | Salix         | Platanus     |
| <b>Ester and Acid</b>            |                 | <b>2.795</b>          | <b>5.069</b> | <b>7.579</b> | <b>5.797</b> | <b>7.532</b> | <b>2.339</b> | <b>12.461</b> | <b>1.653</b> |
| 2-Butenoic acid, 2-methyl-, (E)- | 4.57            | -                     | -            | -            | 1.140        | -            | -            | -             | -            |
| Pentanoic acid, 4-oxo-           | 6.03            | -                     | -            | 0.554        | -            | -            | -            | -             | -            |
| 4-Acetylbutyric acid             | 6.99            | 0.927                 | 0.723        | 0.628        | -            | 0.603        | 0.545        | -             | -            |

S21

|                                                                   |       |               |               |               |               |              |               |               |               |
|-------------------------------------------------------------------|-------|---------------|---------------|---------------|---------------|--------------|---------------|---------------|---------------|
| Benzenepropanoic acid                                             | 8.73  | -             | -             | -             | -             | -            | 0.431         | -             | -             |
| Benzoic acid, 3-hydroxy-                                          | 10.06 | -             | -             | 4.208         | 3.743         | 0.761        | -             | -             | -             |
| Benzenoacetic acid, 4-hydroxy-3-methoxy-                          | 11.38 | 0.787         | 2.168         | 1.012         | -             | 4.994        | -             | 9.116         | -             |
| .beta.-(4-Hydroxy-3-methoxyphenyl)propionic acid                  | 12.30 | -             | -             | -             | -             | 0.619        | -             | 1.073         | -             |
| Dibutyl phthalate                                                 | 13.75 | 0.640         | 1.728         | 0.709         | 0.535         | 0.554        | 0.617         | 1.979         | -             |
| n-Hexadecanoic acid                                               | 14.51 | 0.441         | 0.449         | 0.468         | 0.378         | -            | 0.465         | 0.293         | 1.101         |
| Octadecanoic acid                                                 | 15.31 | -             | -             | -             | -             | -            | -             | -             | 0.140         |
| 8-METHOXY-5,6-DIHYDROBENZO(1,2-B:5,4-B')DIFURAN-2-CARBOXYLIC ACID | 16.22 | -             | -             | -             | -             | -            | 0.282         | -             | -             |
| Hexadecanoic acid, 2-hydroxy-1-(hydroxymethyl)ethyl ester         | 17.77 | -             | -             | -             | -             | -            | -             | -             | 0.412         |
| <b>Ketone and Alcohol</b>                                         |       | <b>14.541</b> | <b>11.129</b> | <b>11.216</b> | <b>10.503</b> | <b>9.259</b> | <b>12.319</b> | <b>11.056</b> | <b>13.917</b> |
| 2(3H)-Furanone, dihydro-                                          | 4.18  | -             | -             | -             | 0.916         | -            | -             | -             | -             |
| 2,5-Hexanedione                                                   | 4.34  | 2.092         | 2.129         | 2.233         | 2.254         | 3.051        | 3.057         | -             | -             |
| 2(3H)-Furanone, dihydro-5-methyl-                                 | 4.67  | -             | -             | -             | 0.556         | 0.619        | 0.722         | -             | -             |
| 2(3H)-Furanone, 5-ethyl-dihydro-5-methyl-                         | 5.50  | 1.652         | 0.828         | -             | -             | -            | -             | -             | -             |
| Benzenemethanol                                                   | 5.62  | -             | -             | -             | -             | -            | -             | -             | 0.433         |
| Ethanone, 1-(3-methyl-1H-pyrazol-4-yl)-                           | 5.97  | -             | -             | -             | -             | -            | -             | -             | 0.809         |
| Benzenethanol                                                     | 6.50  | -             | -             | -             | -             | -            | -             | -             | 0.753         |
| 3-Penten-2-one, 4-methyl-                                         | 6.83  | -             | -             | -             | 0.831         | -            | -             | -             | -             |
| Benzenethanol, 2-methoxy-                                         | 8.17  | 2.296         | 2.411         | 2.055         | -             | 5.590        | -             | 5.825         | 4.171         |
| Ethanone, 1-(3-hydroxyphenyl)-                                    | 9.22  | -             | -             | -             | -             | -            | -             | 1.159         | -             |
| 4-Methoxy-4-methyl-2,5-cyclohexadienone                           | 9.30  | -             | -             | -             | -             | -            | -             | -             | 0.885         |

|                                                               |       |               |               |               |               |               |               |              |              |
|---------------------------------------------------------------|-------|---------------|---------------|---------------|---------------|---------------|---------------|--------------|--------------|
| Ethanone, 1-(4-hydroxy-3-methoxyphenyl)-                      | 9.58  | -             | -             | -             | -             | -             | -             | 3.408        | 1.713        |
| 2H-Pyran-2,4(3H)-dione, 3-acetyl-6-methyl-                    | 9.67  | 1.695         | 2.070         | 1.639         | 2.324         | -             | 3.124         | -            | -            |
| 2-Propanone, 1-(4-hydroxy-3-methoxyphenyl)-                   | 9.88  | -             | -             | -             | -             | -             | -             | -            | 3.120        |
| 1,2,3,6,7,7a-Hexahydro-4,7a-dimethyl-5H-inden-5-one           | 10.31 | 0.229         | -             | -             | -             | -             | -             | -            | -            |
| Homovanillyl alcohol                                          | 10.40 | 2.578         | -             | 1.986         | -             | -             | -             | -            | -            |
| 2,4-Dimethoxybenzyl alcohol                                   | 10.94 | -             | -             | 0.396         | -             | -             | -             | -            | -            |
| (3S)-2-chloro-1-phenyl-1-penten-3-ol                          | 11.01 | 1.026         | -             | -             | -             | -             | -             | -            | -            |
| 2-Pentanone, 1-(2,4,6-trihydroxyphenyl)                       | 12.75 | 2.972         | 3.692         | 2.908         | 3.401         | -             | 5.055         | -            | -            |
| Ethanone, 1-(4-hydroxy-3,5-dimethoxyphenyl)-                  | 15.01 | -             | -             | -             | -             | -             | -             | -            | 1.781        |
| 1-[2,4,6-Tris(1-methylethyl)phenyl]1,2-butadione              | 15.41 | -             | -             | -             | -             | -             | -             | 0.319        | -            |
| 9H-Xanthen-9-one, 1-hydroxy-3,5,6-trimethoxy-                 | 15.61 | -             | -             | -             | -             | -             | -             | 0.345        | -            |
| 2-Methyl-6-oxo-7-(phenylthio)heptan-3-ol                      | 16.21 | -             | -             | -             | 0.223         | -             | -             | -            | -            |
| Podocarp-12-en-14a-ol                                         | 16.31 | -             | -             | -             | -             | -             | 0.362         | -            | -            |
| Pyrrolo[1,2-a]pyrazine-1,4-dione, hexahydro-3-(phenylmethyl)- | 18.13 | -             | -             | -             | -             | -             | -             | -            | 0.253        |
| <b>Cyclopentenone</b>                                         |       | <b>15.950</b> | <b>14.936</b> | <b>13.844</b> | <b>18.970</b> | <b>15.589</b> | <b>16.664</b> | <b>9.605</b> | <b>8.112</b> |
| 2-Cyclopenten-1-one.2-methyl-                                 | 4.07  | 3.197         | 3.480         | 3.260         | 4.375         | 3.500         | 3.060         | -            | -            |
| 2-Cyclopenten-1-one.3-methyl-                                 | 4.78  | 1.920         | 1.900         | 1.788         | 2.447         | 2.101         | 2.330         | 2.085        | 1.819        |
| 2-Cyclopenten-1-one, 3,4-dimethyl-                            | 5.13  | 1.218         | 0.754         | 0.644         | 0.786         | -             | 0.627         | -            | -            |

S23

|                                                                                     |       |               |               |               |               |               |               |               |               |
|-------------------------------------------------------------------------------------|-------|---------------|---------------|---------------|---------------|---------------|---------------|---------------|---------------|
| 2-Cyclopenten-1-one, 2-hydroxy-3-methyl-                                            | 5.54  | 2.662         | 2.325         | 2.572         | 2.373         | 3.769         | 3.307         | 3.095         | 2.049         |
| 2-Cyclopenten-1-one,2,3-dimethyl-                                                   | 5.67  | 2.515         | 2.071         | 1.801         | 2.229         | 1.835         | 1.624         | 1.720         | 1.742         |
| 3,5-DIMETHYL CYCLOPENTENOLONE                                                       | 5.89  | 1.268         | 1.293         | 1.250         | 0.854         | 1.035         | 1.313         | 0.991         | 0.643         |
| 2-Cyclopenten-1-one, 3-ethyl-2-hydroxy-                                             | 6.56  | 1.229         | 1.195         | 0.695         | -             | -             | -             | -             | -             |
| 2,5-Cyclohexadiene-1,4-dione, 2-hydroxy-5-methyl-                                   | 6.61  | -             | -             | 0.745         | -             | 1.024         | -             | -             | -             |
| 2-Acetylcyclopentanone                                                              | 7.24  | 0.927         | 1.020         | -             | 0.879         | 0.722         | -             | 0.526         | 0.689         |
| 2-Hydroxy-3-propyl-2-cyclopenten-1-one                                              | 7.51  | -             | -             | -             | -             | -             | 0.253         | -             | -             |
| 2-Cyclohexen-1-one, 4-(1-methylethyl)-                                              | 7.89  | 1.016         | 0.897         | 1.089         | -             | 1.603         | -             | -             | -             |
| 7,7-dimethylbicyclo[3.3.0]octan-2-one                                               | 8.17  | -             | -             | -             | 3.858         | -             | -             | -             | -             |
| 2-Cyclopenten-1-one, 2,3,4,5-tetramethyl-                                           | 9.47  | -             | -             | -             | -             | -             | -             | 1.189         | -             |
| (E)-4-[2-Methyl-4-(2,6,6-trimethyl-1-cyclohexen-1-yl)-2-butenyl]-3-cyclohexen-1-one | 10.03 | -             | -             | -             | -             | -             | -             | -             | 0.369         |
| 2,5-Cyclohexadiene-1,4-dione, 2,3-dimethoxy-5-methyl-                               | 10.40 | -             | -             | -             | -             | -             | 2.313         | -             | -             |
| 5-(3'-Methyliden-2'-oxa-butyliden)-3,3-dimethyl-cyclohexanone                       | 11.60 | -             | -             | -             | -             | -             | 0.274         | -             | -             |
| Bicyclo[4.3.0]nonan-2-one, 8-isopropylidene-                                        | 11.66 | -             | -             | -             | -             | -             | -             | -             | 0.798         |
| 8,8-Dimethyl-1,9-diazabicyclo[5.3.0]decane-5,10-dione                               | 12.30 | -             | -             | -             | 1.169         | -             | 1.563         | -             | -             |
| <b>Phenolics</b>                                                                    |       | <b>50.347</b> | <b>55.026</b> | <b>55.525</b> | <b>52.981</b> | <b>50.775</b> | <b>49.158</b> | <b>55.742</b> | <b>62.303</b> |

|                                                           |       |        |        |        |        |        |        |        |        |
|-----------------------------------------------------------|-------|--------|--------|--------|--------|--------|--------|--------|--------|
| Phenol                                                    | 5.03  | 4.682  | 5.630  | 11.037 | 6.842  | 8.533  | 2.918  | 4.174  | 13.476 |
| Phenol.2-methyl-                                          | 5.86  | -      | -      | -      | 0.646  | 0.709  | -      | 0.417  | 0.369  |
| Phenol.3-methyl-                                          | 6.08  | -      | -      | -      | -      | -      | -      | 3.872  | -      |
| Phenol.4-methyl-                                          | 6.08  | 1.718  | 1.824  | 1.585  | 2.294  | 3.466  | -      | -      | -      |
| Phenol.2-methoxy-                                         | 6.24  | 7.610  | 9.062  | 6.856  | 5.490  | 14.456 | 6.552  | 22.608 | 9.583  |
| Phenol.4-ethyl-                                           | 7.05  | 0.902  | -      | -      | -      | 0.745  | 0.384  | 1.315  | -      |
| Phenol.2-methoxy-4-methyl-                                | 7.32  | 1.457  | 1.550  | 1.229  | 2.680  | 2.901  | 1.033  | -      | 1.057  |
| 1,2-Benzenediol                                           | 7.40  | 6.819  | 6.094  | 5.405  | 6.033  | 6.907  | 4.957  | 11.609 | 6.485  |
| Phenol, 3-methoxy-                                        | 7.68  | -      | -      | -      | -      | 0.596  | 7.985  | -      | -      |
| 1,2-Benzenediol.3-methoxy-                                | 8.02  | 5.793  | 7.137  | 6.124  | 7.623  | -      | -      | -      | 9.356  |
| Hydroquinone                                              | 8.14  | 1.294  | 1.364  | 2.049  | -      | -      | -      | 1.741  | -      |
| 1,2-Benzenediol, 4-methyl-                                | 8.30  | 0.978  | 1.025  | 0.970  | 1.219  | 1.707  | 0.928  | 2.035  | 0.910  |
| 1,4-Benzenediol.2-methyl-                                 | 8.78  | 2.360  | 2.485  | 3.312  | 3.564  | 3.811  | 2.756  | 3.925  | 2.107  |
| Phenol.2,6-dimethoxy-                                     | 8.84  | 12.701 | 14.934 | 13.129 | 14.589 | 4.296  | 19.040 | -      | 18.470 |
| CIS-ISOEUGENOL                                            | 8.89  | -      | -      | -      | -      | -      | -      | 0.695  | -      |
| Phenol.3,4-dimethoxy-                                     | 8.94  | 0.647  | 0.621  | 0.503  | 0.604  | -      | 0.921  | -      | -      |
| Phenol, 2-methoxy-4-propyl-                               | 8.99  | 0.343  | 0.561  | -      | -      | 0.994  | -      | 1.180  | -      |
| 1,2,3-Benzenetriol                                        | 9.10  | -      | -      | 1.474  | -      | -      | -      | -      | -      |
| 1,4-Benzenediol, 2-methoxy-                               | 9.26  | 0.172  | -      | -      | -      | -      | -      | -      | -      |
| 3,7-Di-tert-butyl-1-naphthol                              | 9.39  | 0.547  | -      | -      | -      | -      | -      | -      | -      |
| 1,3-Benzenediol, 4-ethyl-                                 | 9.48  | -      | 0.705  | -      | -      | -      | -      | -      | -      |
| Phenol, 4-(3-hydroxy-1-propenyl)-2-methoxy-               | 10.76 | -      | -      | -      | -      | 0.784  | -      | -      | -      |
| Phenol, 2,6-dimethoxy-4-(2-propenyl)-                     | 10.96 | 0.357  | 0.390  | -      | -      | -      | -      | -      | 0.491  |
| Phenol, 2,6-dimethyl-4-nitro-                             | 12.40 | -      | -      | -      | -      | -      | -      | 1.158  | -      |
| Phenol, 2,2'-methylenebis[6-(1,1-dimethylethyl)-4-methyl- | 17.30 | 1.969  | S25    | 1.857  | 1.399  | 0.869  | 1.683  | 0.707  | -      |
| Gigantol                                                  | 20.03 | -      | -      | -      | -      | -      | -      | 0.305  | -      |

|                                                   |       |              |              |              |              |              |              |              |              |
|---------------------------------------------------|-------|--------------|--------------|--------------|--------------|--------------|--------------|--------------|--------------|
| <b>Furan&amp;Aldehydes</b>                        |       | <b>2.421</b> | <b>2.294</b> | <b>2.439</b> | <b>2.600</b> | <b>0.517</b> | <b>3.090</b> | <b>4.696</b> | <b>3.433</b> |
| 2-Acetyl-5-methylfuran                            | 5.64  | 0.371        | 0.228        | 0.412        | 0.346        | 0.517        | 0.422        | 0.359        | -            |
| Cyclopentanecarboxaldehyde, 2-methyl-3-methylene- | 6.33  | -            | -            | -            | -            | -            | -            | -            | 0.148        |
| 5-Ethyl-2-furaldehyde                             | 6.36  | -            | -            | -            | 0.229        | -            | -            | -            | -            |
| Vanillin                                          | 9.14  | -            | -            | -            | -            | -            | -            | -            | 1.111        |
| Benzaldehyde, 4-hydroxy-3-methoxy-                | 9.32  | -            | -            | -            | -            | -            | -            | 4.338        | -            |
| 2,4-Dimethyl-3-(methoxycarbonyl)-5-ethylfuran     | 10.34 | 2.051        | 2.066        | 2.028        | 2.026        | -            | 2.668        | -            | -            |
| E-15-Heptadecenal                                 | 10.96 | -            | -            | -            | -            | -            | -            | -            | 1.328        |
| Syringaldehyde                                    | 11.36 | -            | -            | -            | -            | -            | -            | -            | 0.845        |
| <b>Alkane &amp; Alkene &amp; Alkyne</b>           |       | <b>0.158</b> | <b>0.000</b> | <b>0.000</b> | <b>0.000</b> | <b>1.952</b> | <b>0.185</b> | <b>3.918</b> | <b>4.804</b> |
| Cyclobutene, 1,2,3,4-tetramethyl-, cis-           | 5.13  | -            | -            | -            | -            | 1.178        | 0.185        | -            | -            |
| 2,4-Hexadiene, 3,4-dimethyl-, (Z,Z)-              | 5.15  | -            | -            | -            | -            | -            | -            | 0.622        | -            |
| 1,5-Hexadiyne                                     | 7.71  | -            | -            | -            | -            | -            | -            | -            | 0.494        |
| Silacyclohexadiene-2,5                            | 7.90  | -            | -            | -            | -            | -            | -            | 1.101        | -            |
| 1-[2-(Trimethylsilyl)ethynyl]-3-phenylcyclohexene | 8.80  | -            | -            | -            | -            | -            | -            | 1.744        | -            |
| 1-Hexadecene                                      | 10.06 | -            | -            | -            | -            | -            | -            | -            | 1.610        |
| 1,2-Dimethylenecyclohexane                        | 10.08 | -            | -            | -            | -            | -            | -            | 0.451        | -            |
| 3-(2-naphthyl)-1-butene                           | 10.34 | -            | -            | -            | -            | 0.774        | -            | -            | -            |
| Cyclohexadecane, 1,2-diethyl-                     | 15.66 | -            | -            | -            | -            | -            | -            | -            | 1.208        |
| 1-Octadecene                                      | 16.13 | 0.158        | -            | -            | -            | -            | -            | -            | -            |
| Cyclotetracosane                                  | 17.12 | -            | S26          | -            | -            | -            | -            | -            | 0.551        |
| 1-Nonadecene                                      | 17.33 | -            | -            | -            | -            | -            | -            | -            | 0.772        |
| 1-Docosene                                        | 17.92 | -            | -            | -            | -            | -            | -            | -            | 0.169        |



---

|               |               |               |              |              |               |               |              |              |
|---------------|---------------|---------------|--------------|--------------|---------------|---------------|--------------|--------------|
| <b>Others</b> | <b>13.784</b> | <b>11.546</b> | <b>9.395</b> | <b>9.148</b> | <b>14.376</b> | <b>16.244</b> | <b>2.522</b> | <b>5.778</b> |
|---------------|---------------|---------------|--------------|--------------|---------------|---------------|--------------|--------------|

---

**Table S10. Detailed chemicals of heavy oil from branches**

| Heavy Oil-Branches                                        |                 |                       |               |               |               |               |               |               |               |
|-----------------------------------------------------------|-----------------|-----------------------|---------------|---------------|---------------|---------------|---------------|---------------|---------------|
| Compound Name                                             | RT <sup>a</sup> | Plant Name / Area (%) |               |               |               |               |               |               |               |
|                                                           |                 | Cinnamomum            | Viburnum      | Distylium     | Pittosporum   | Pinus         | Cupressus     | Salix         | Platanus      |
| <b>Ester and Acid</b>                                     |                 | <b>13.156</b>         | <b>24.637</b> | <b>19.082</b> | <b>28.738</b> | <b>19.101</b> | <b>13.551</b> | <b>10.876</b> | <b>3.623</b>  |
| 3-Hydroxy-4-methoxybenzoic acid                           | 9.67            | -                     | 3.862         | -             | -             | -             | -             | -             | -             |
| Benzeneacetic acid, 4-hydroxy-3-methoxy-                  | 10.40           | -                     | -             | -             | -             | 3.181         | -             | 9.612         | -             |
| 1,2-Benzenedicarboxylic acid, dibutyl ester               | 13.45           | -                     | -             | -             | -             | -             | -             | 1.264         | -             |
| Dibutyl phthalate                                         | 13.75           | 4.458                 | 4.371         | 5.234         | 5.741         | 5.378         | 3.987         | -             | -             |
| n-Hexadecanoic acid                                       | 14.51           | 7.456                 | 10.636        | 9.147         | 9.365         | 6.436         | 7.452         | -             | -             |
| 9,12-Octadecadienoic acid (Z,Z)-                          | 15.70           | 1.240                 | -             | -             | 5.687         | -             | -             | -             | -             |
| 9-Octadecenoic acid, (E)-                                 | 15.74           | -                     | 2.916         | 4.702         | 3.589         | -             | -             | -             | -             |
| Octadecanoic acid                                         | 15.87           | -                     | -             | -             | -             | -             | 2.114         | -             | -             |
| Benzeneacetic acid, 4-hydroxy-3-methoxy-, methyl ester    | 16.85           | -                     | -             | -             | 4.357         | -             | -             | -             | -             |
| DEHYDROABIETIC ACID                                       | 16.92           | -                     | -             | -             | -             | 4.107         | -             | -             | -             |
| Hexadecanoic acid, 2-hydroxy-1-(hydroxymethyl)ethyl ester | 17.78           | -                     | 2.852         | -             | -             | -             | -             | -             | 3.623         |
| <b>Ketone and Alcohol</b>                                 |                 | <b>7.325</b>          | <b>9.843</b>  | <b>4.787</b>  | <b>3.032</b>  | <b>13.762</b> | <b>3.024</b>  | <b>15.980</b> | <b>13.860</b> |
| Benzeneethanol, 2-methoxy-                                | 8.17            | 5.202                 | 4.927         | 4.787         | 3.032         | 13.762        | 3.024         | 12.746        | 5.225         |
| Ethanone, 1-(4-hydroxy-3-methoxyphenyl)-                  | 9.58            | -                     | -             | -             | -             | -             | -             | 0.581         | -             |
| 2-Propanone, 1-(4-hydroxy-3-methoxyphenyl)-               | 9.88            | -                     | -             | -             | -             | -             | -             | 2.651         | -             |

|                                                                 |        |               |               |               |               |               |               |               |               |
|-----------------------------------------------------------------|--------|---------------|---------------|---------------|---------------|---------------|---------------|---------------|---------------|
| Homovanillyl alcohol                                            | 10.40  | -             | 1.812         | -             | -             | -             | -             | -             | -             |
| (3S)-2-chloro-1-phenyl-1-penten-3-ol                            | 11.01  | -             | -             | -             | -             | -             | -             | -             | 3.643         |
| 2-Pentanone, 1-(2,4,6-trihydroxyphenyl)                         | 12.75  | -             | -             | -             | -             | -             | -             | -             | 1.634         |
| 1,6-Dimethylthieno[2',3':3,4]bicyclo[3.3.0]oct-6(7)-en-2-one    | 13.65  | 2.122         | -             | -             | -             | -             | -             | -             | -             |
| Androst-16-en-3-one, (5.alpha.)-                                | 18.48  | -             | -             | -             | -             | -             | -             | -             | 3.359         |
| Androst-5,16-diene-3.beta.-ol                                   | 18.89  | -             | 3.104         | -             | -             | -             | -             | -             | -             |
| <b>Cyclopentenone</b>                                           |        | <b>6.347</b>  | <b>5.986</b>  | <b>2.576</b>  | <b>2.808</b>  | <b>2.870</b>  | <b>34.449</b> | <b>0.000</b>  | <b>0.000</b>  |
| 2-Cyclopenten-1-one, 2-methyl-                                  | 4.07   | 2.494         | 2.439         | 2.576         | 2.808         | 2.870         | 21.664        | -             | -             |
| 2,5-Hexanedione                                                 | 4.36   | -             | -             | -             | -             | -             | 2.588         | -             | -             |
| 2-Cyclopenten-1-one, 3-methyl-                                  | 4.81   | -             | -             | -             | -             | -             | 4.118         | -             | -             |
| 2-Cyclopenten-1-one.2,3-dimethyl-                               | 5.67   | -             | 1.351         | -             | -             | -             | 6.079         | -             | -             |
| 3,5-Cyclohexadiene-1,2-dione, 3,4,5,6-tetrachloro-              | 14.60  | 1.725         | 2.196         | -             | -             | -             | -             | -             | -             |
| 2-Methoxy-5-(2',3'-dimethoxyphenyl)cyclohepta-2,4,6-trien-1-one | 18.88  | 2.128         | -             | -             | -             | -             | -             | -             | -             |
| <b>Phenolics</b>                                                |        | <b>60.579</b> | <b>49.943</b> | <b>60.614</b> | <b>57.914</b> | <b>53.907</b> | <b>40.381</b> | <b>40.199</b> | <b>41.438</b> |
| Phenol                                                          | 5.03   | 3.024         | 3.801         | 10.485        | 6.419         | 6.533         | 5.169         | -             | 10.248        |
| Phenol.4-methyl-                                                | 6.08   | 2.316         | 1.811         | -             | 2.591         | -             | -             | -             | -             |
| Phenol.2-methoxy-                                               | 6.24   | 9.157         | 9.573         | 8.693         | 7.000         | 17.988        | 7.917         | 15.557        | 8.415         |
| Phenol.4-ethyl-                                                 | 7.05   | 2.498         | -             | -             | -             | -             | -             | -             | -             |
| Phenol.4-methoxy-2-methyl-                                      | 7.23   | -             | -             | -             | -             | -             | -             | -             | 1.479         |
| Phenol.2-methoxy-4-methyl-                                      | 7.32   | 2.347         | 2.698         | 2.352         | 2.392         | 5.400         | -             | -             | -             |
| 2-Methoxy-5-methylphenol                                        | 7.41   | -             | -             | -             | -             | -             | -             | 3.865         | -             |
| 1,2-Benzenediol.3-methoxy-                                      | 8.02   | 2.245         | -             | -             | -             | -             | -             | -             | -             |
| Phenol.2,6-dimethoxy-                                           | 2.050  | 2.572         | S24           | -             | 5.052         | -             | 3.548         | 1.970         | 2.050         |
| Phenol, 2-methoxy-4-propyl-                                     | 1.608  | 1.867         | -             | -             | -             | -             | 4.095         | -             | 1.608         |
| Phenol, 2-methoxy-4-(2-propenyl)-                               | -      | -             | -             | -             | 3.020         | -             | -             | -             | -             |
| CIS-ISOEUGENOL                                                  | -      | -             | -             | -             | -             | -             | -             | 1.652         | -             |
| Phenol, 2,6-dimethoxy-4-(2-propenyl)-                           | 20.676 | 12.595        | 19.193        | 21.964        | 13.251        | 13.505        | -             | -             | 20.676        |



|                                    |       |              |              |              |              |               |              |              |              |
|------------------------------------|-------|--------------|--------------|--------------|--------------|---------------|--------------|--------------|--------------|
| 1-Heptadecene                      | 18.47 | -            | -            | -            | -            | -             | -            | -            | 15.504       |
| 6-nitroindole[2,3-a]cyclodec-1-ene | 21.28 | -            | -            | -            | -            | -             | -            | 12.417       | -            |
| <b>Others</b>                      |       | <b>5.623</b> | <b>3.208</b> | <b>6.011</b> | <b>0.000</b> | <b>10.359</b> | <b>4.611</b> | <b>0.000</b> | <b>0.000</b> |
